# Supplementary material
Source: publisher figshare collection journal article supplement (https://gsapubs.figshare.com/ndownloader/files/28038471)
Supplement: Supplementary file 1 [file 28038471]

## Supplement

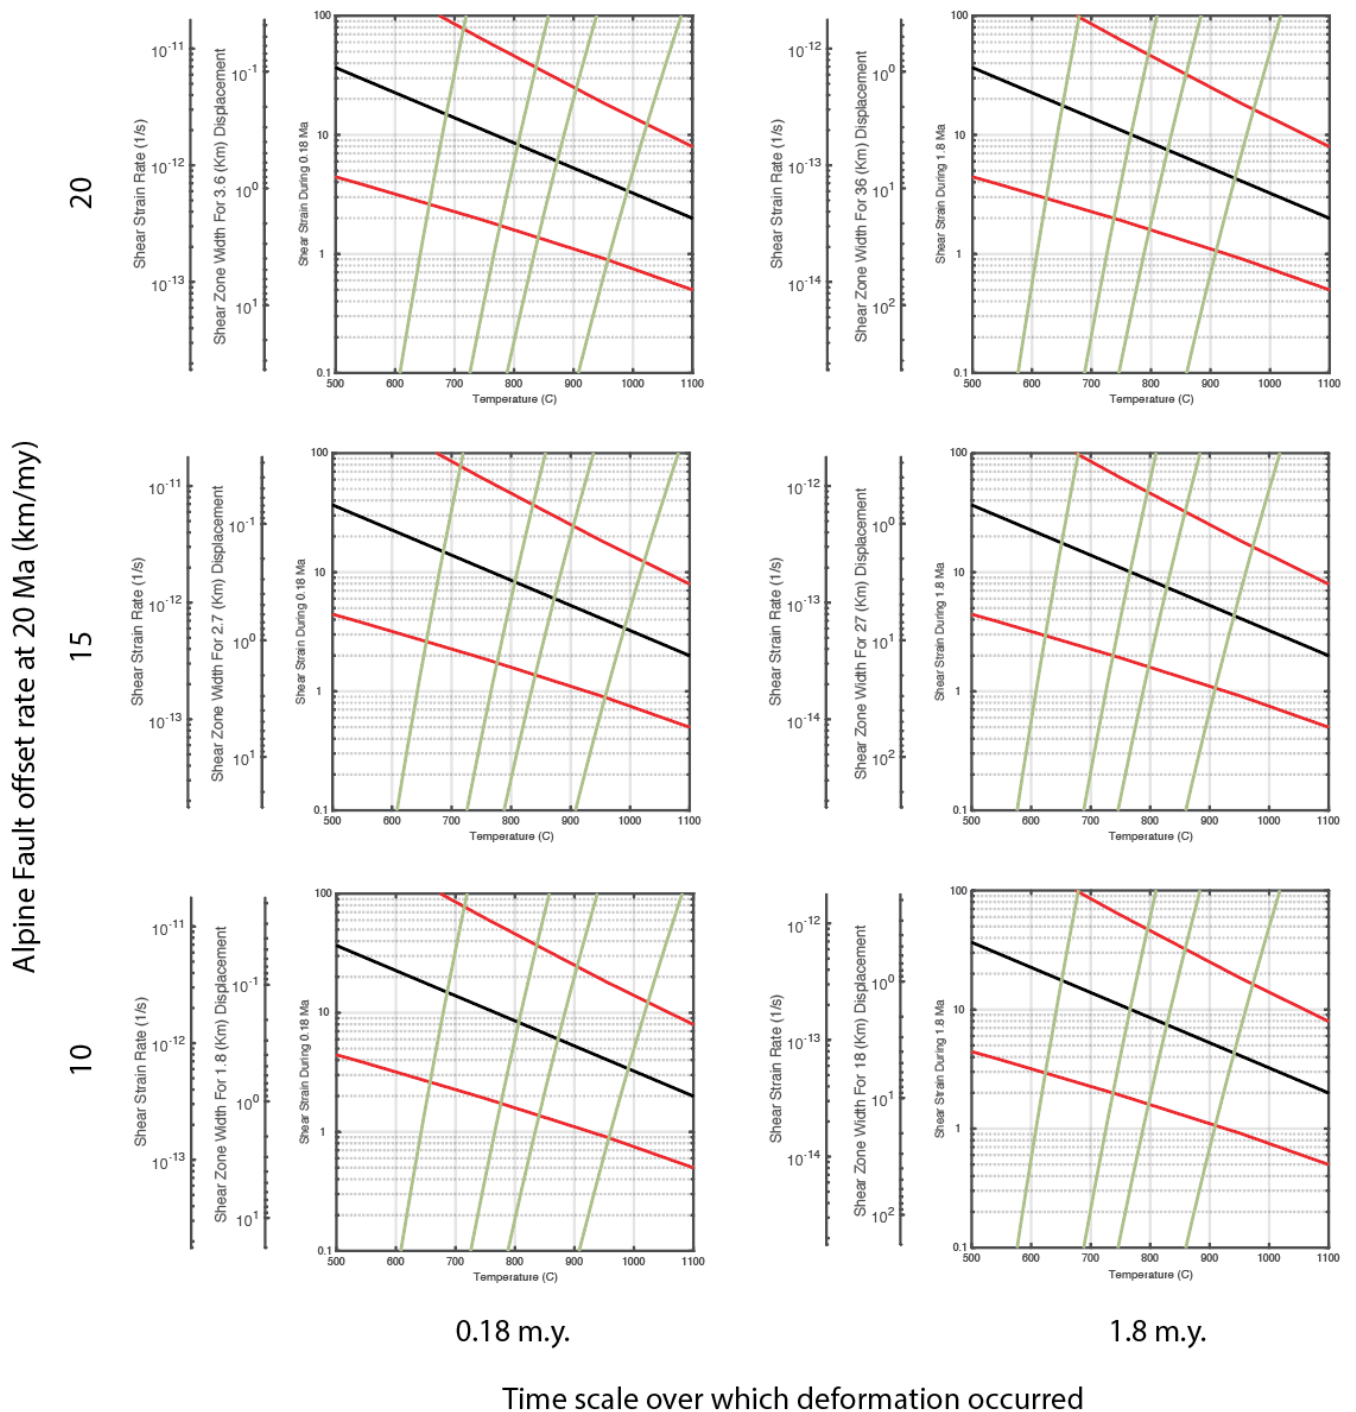

Figure S1: Exploration of the effect of uncertainties in Alpine fault offset rate and deformation on Fig. 3. Parameters explored are early Alpine Fault offset rates of 10, 15, and 20 km/my and time scales of 1.8 m.y. and 0.18 m.y. Largest permitted shear zone width is 32 km.

Accompanying zip file contains:

- 1) Polyfit\_errors\_HS\_2.m: Matlab code necessary to create and modify figure 3 from the main text
- 2) 50\_perc\_data.mat: Data table used to create Cross and Skemer relationship and uncertainties
- 3) Olv\_par.mat. Data table containing flow law parameters
